# Supplementary material for: Establishment of LC-MS/MS Method for Determination of GMDTC in Rat Plasma and Its Application in Preclinical Pharmacokinetics
Source: MDPI journal article supplement (doi:10.3390/molecules28031191), 2023-01-25
Supplement: s1 [file s1]

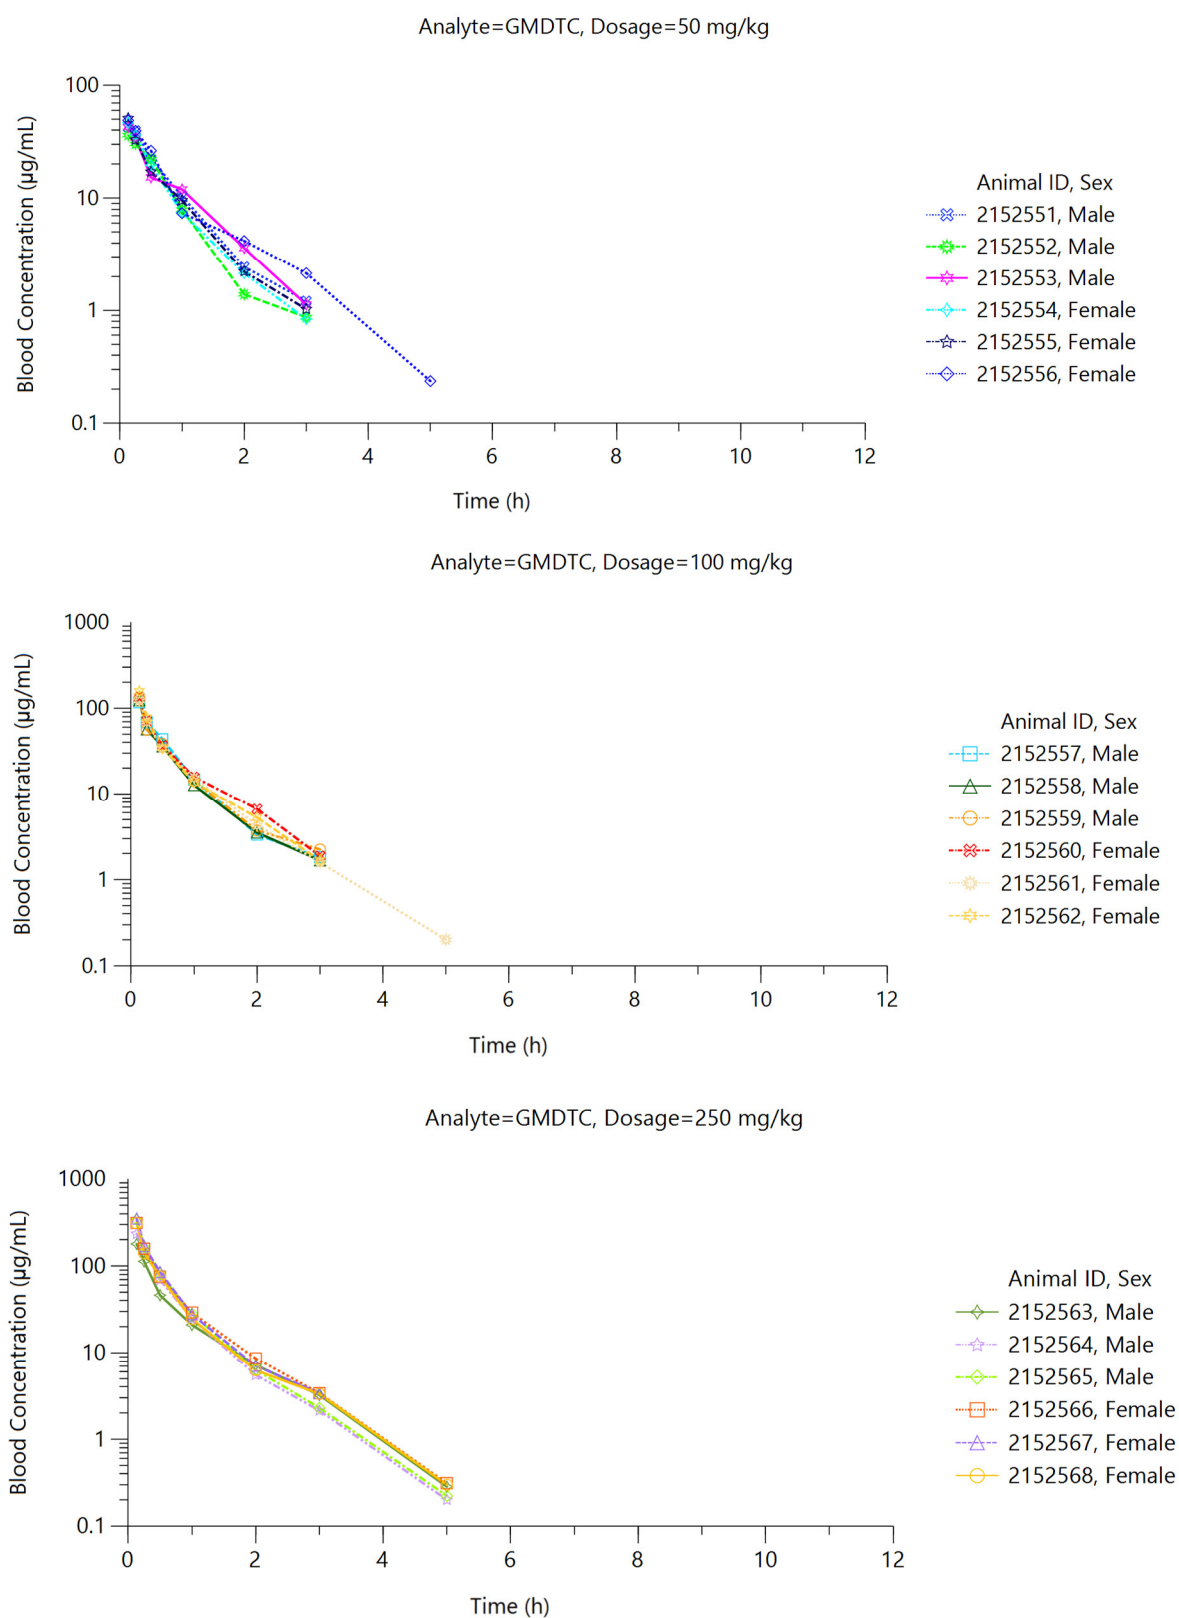

Figure S1. Individual concentration-time curves of GMDTC in rat whole blood after single intravenous infusion administration in each dose group (50, 100 and 250 mg/kg).

Table S1. Concentration-time variation of GMDTC in whole blood of rats (50 mg/kg) after intravenous infusion administration

| determinand | Dose     | Sex    | Animal number | Time(h)                          |       |       |       |       |       |       |      |    |    |
|-------------|----------|--------|---------------|----------------------------------|-------|-------|-------|-------|-------|-------|------|----|----|
|             |          |        |               | Before the medicine              | 0.133 | 0.25  | 0.5   | 1     | 2     | 3     | 5    | 8  | 12 |
|             |          |        |               | Whole blood concentration(μg/mL) |       |       |       |       |       |       |      |    |    |
| GMDTC       | 50 mg/kg | Male   | 2152551       | 0.00                             | 42.34 | 39.66 | 22.31 | 10.41 | 2.44  | 1.21  | ND   | ND | ND |
|             |          |        | 2152552       | 0.00                             | 36.11 | 30.18 | 22.16 | 7.93  | 1.39  | 0.87  | ND   | ND | ND |
|             |          |        | 2152553       | 0.00                             | 42.76 | 34.51 | 15.28 | 11.95 | 3.60  | 1.12  | ND   | ND | ND |
|             |          |        | n             | 3                                | 3     | 3     | 3     | 3     | 3     | 3     | 0    | 0  | 0  |
|             |          |        | Mean          | 0.00                             | 40.40 | 34.78 | 19.92 | 10.10 | 2.48  | 1.07  | NA   | NA | NA |
|             |          |        | RE            | 0.00                             | 3.72  | 4.75  | 4.02  | 2.03  | 1.11  | 0.18  | NA   | NA | NA |
|             |          |        | %RSD          | NA                               | 9.21  | 13.65 | 20.16 | 20.08 | 44.78 | 16.72 | NA   | NA | NA |
|             |          | Female | 2152554       | 0.00                             | 46.48 | 36.30 | 19.60 | 7.46  | 2.13  | 0.83  | ND   | ND | ND |
|             |          |        | 2152555       | 0.00                             | 51.08 | 32.88 | 17.12 | 9.56  | 2.22  | 1.02  | ND   | ND | ND |
|             |          |        | 2152556       | 0.00                             | 48.79 | 39.41 | 26.30 | 7.38  | 4.17  | 2.14  | 0.24 | ND | ND |
|             |          |        | n             | 3                                | 3     | 3     | 3     | 3     | 3     | 3     | 0    | 0  | 0  |
|             |          |        | Mean          | 0.00                             | 48.78 | 36.20 | 21.01 | 8.13  | 2.84  | 1.33  | 0.24 | NA | NA |
|             |          |        | RE            | 0.00                             | 2.30  | 3.26  | 4.75  | 1.24  | 1.15  | 0.71  | NA   | NA | NA |
|             |          |        | %RSD          | NA                               | 4.72  | 9.02  | 22.62 | 15.25 | 40.54 | 53.00 | NA   | NA | NA |

Note: 0.133 h is the immediate end of dosing.

Table S2. Concentration-time variation of GMDTC in whole blood of rats (100 mg/kg) after intravenous infusion administration

| Determinand | Dose      | Sex    | Animal number | Time(h)                          |        |       |       |       |       |       |      |    |    |
|-------------|-----------|--------|---------------|----------------------------------|--------|-------|-------|-------|-------|-------|------|----|----|
|             |           |        |               | Before the medicine              | 0.133  | 0.25  | 0.5   | 1     | 2     | 3     | 5    | 8  | 12 |
|             |           |        |               | Whole blood concentration(μg/mL) |        |       |       |       |       |       |      |    |    |
| GMDTC       | 100 mg/kg | Male   | 2152557       | 0.00                             | 117.02 | 68.63 | 43.85 | 14.73 | 3.32  | 1.81  | ND   | ND | ND |
|             |           |        | 2152558       | 0.00                             | 123.42 | 56.80 | 35.94 | 12.70 | 3.51  | 1.67  | ND   | ND | ND |
|             |           |        | 2152559       | 0.00                             | 129.51 | 56.15 | 38.55 | 14.22 | 3.71  | 2.24  | ND   | ND | ND |
|             |           |        | n             | 3                                | 3      | 3     | 3     | 3     | 3     | 3     | 0    | 0  | 0  |
|             |           |        | Mean          | 0.00                             | 123.32 | 60.53 | 39.45 | 13.89 | 3.52  | 1.91  | NA   | NA | NA |
|             |           |        | RE            | 0.00                             | 6.25   | 7.03  | 4.03  | 1.06  | 0.20  | 0.30  | NA   | NA | NA |
|             |           |        | %RSD          | NA                               | 5.07   | 11.61 | 10.22 | 7.61  | 5.60  | 15.49 | NA   | NA | NA |
|             |           | Female | 2152560       | 0.00                             | 134.99 | 71.89 | 37.04 | 15.83 | 6.64  | 1.88  | ND   | ND | ND |
|             |           |        | 2152561       | 0.00                             | 121.81 | 68.94 | 34.01 | 15.43 | 4.29  | 1.58  | 0.20 | ND | ND |
|             |           |        | 2152562       | 0.00                             | 157.36 | 77.64 | 34.88 | 13.69 | 5.27  | 1.67  | ND   | ND | ND |
|             |           |        | n             | 3                                | 3      | 3     | 3     | 3     | 3     | 3     | 1    | 0  | 0  |
|             |           |        | Mean          | 0.00                             | 138.05 | 72.82 | 35.31 | 14.98 | 5.40  | 1.71  | 0.20 | NA | NA |
|             |           |        | RE            | 0.00                             | 17.98  | 4.43  | 1.56  | 1.14  | 1.18  | 0.15  | NA   | NA | NA |
|             |           |        | %RSD          | NA                               | 13.02  | 6.08  | 4.41  | 7.61  | 21.81 | 8.94  | NA   | NA | NA |

Note: 0.133 h is the immediate end of dosing.

Table S3. Concentration-time variation of GMDTC in whole blood of rats (250 mg/kg) after intravenous infusion administration

| determinand | Dose         | Sex    | Animal number | Time(h)                          |        |        |       |       |       |       |       |    |    |
|-------------|--------------|--------|---------------|----------------------------------|--------|--------|-------|-------|-------|-------|-------|----|----|
|             |              |        |               | Before the medicine              | 0.133  | 0.25   | 0.5   | 1     | 2     | 3     | 5     | 8  | 12 |
|             |              |        |               | Whole blood concentration(μg/mL) |        |        |       |       |       |       |       |    |    |
| GMDTC       | 250<br>mg/kg | Male   | 2152563       | 0.00                             | 179.03 | 112.87 | 46.14 | 21.04 | 7.19  | 3.22  | 0.28  | ND | ND |
|             |              |        | 2152564       | 0.00                             | 233.89 | 152.31 | 69.27 | 24.82 | 5.51  | 2.13  | 0.20  | ND | ND |
|             |              |        | 2152565       | 0.00                             | 339.39 | 164.17 | 81.33 | 28.34 | 6.30  | 2.29  | 0.22  | ND | ND |
|             |              |        | n             | 3                                | 3      | 3      | 3     | 3     | 3     | 3     | 3     | 0  | 0  |
|             |              |        | Mean          | 0.00                             | 250.77 | 143.12 | 65.58 | 24.73 | 6.33  | 2.55  | 0.24  | NA | NA |
|             |              |        | RE            | 0.00                             | 81.50  | 26.86  | 17.89 | 3.65  | 0.84  | 0.59  | 0.04  | NA | NA |
|             |              |        | %RSD          | NA                               | 32.50  | 18.76  | 27.27 | 14.76 | 13.26 | 22.99 | 18.23 | NA | NA |
|             |              | Female | 2152566       | 0.00                             | 312.23 | 158.06 | 75.53 | 29.01 | 8.58  | 3.38  | 0.31  | ND | ND |
|             |              |        | 2152567       | 0.00                             | 350.53 | 170.12 | 85.21 | 27.95 | 7.04  | 3.39  | ND    | ND | ND |
|             |              |        | 2152568       | 0.00                             | 310.32 | 140.17 | 75.60 | 24.58 | 6.25  | 3.33  | 0.30  | ND | ND |
|             |              |        | n             | 3                                | 3      | 3      | 3     | 3     | 3     | 3     | 2     | 0  | 0  |
|             |              |        | Mean          | 0.00                             | 324.36 | 156.12 | 78.78 | 27.18 | 7.29  | 3.37  | 0.30  | NA | NA |
|             |              |        | RE            | 0.00                             | 22.68  | 15.07  | 5.57  | 2.31  | 1.19  | 0.04  | 0.01  | NA | NA |
|             |              |        | %RSD          | NA                               | 6.99   | 9.65   | 7.07  | 8.51  | 16.27 | 1.08  | 2.66  | NA | NA |

Note: 0.133 h is the immediate end of dosing.

Table S4. Pharmacokinetic parameters of GMDTC in whole blood of rats (50 mg/kg) after intravenous infusion administration

| determinand | Dose     | Sex    | Animal number | t <sub>1/2</sub><br>(h) | T <sub>max</sub><br>(h) | C <sub>max</sub><br>(µg/mL) | AUC <sub>0-t</sub><br>(h·µg/mL) | AUC <sub>0-∞</sub><br>(h·µg/mL) | Vd<br>(L/kg) | Vss<br>(L/kg) | Cl<br>(L/h/kg) | MRT <sub>0-t</sub><br>(h) | MRT <sub>0-∞</sub><br>(h) |
|-------------|----------|--------|---------------|-------------------------|-------------------------|-----------------------------|---------------------------------|---------------------------------|--------------|---------------|----------------|---------------------------|---------------------------|
| GMDTC       | 50 mg/kg | Male   | 2152551       | 0.54                    | 0.133                   | 42.34                       | 31.79                           | 32.53                           | 1.21         | 1.03          | 1.54           | 0.60                      | 0.67                      |
|             |          |        | 2152552       | 0.51                    | 0.133                   | 36.11                       | 26.13                           | 26.57                           | 1.37         | 1.14          | 1.88           | 0.55                      | 0.60                      |
|             |          |        | 2152553       | 0.59                    | 0.133                   | 42.76                       | 30.53                           | 31.48                           | 1.34         | 1.24          | 1.59           | 0.69                      | 0.78                      |
|             |          |        | n             | 3                       | 3                       | 3                           | 3                               | 3                               | 3            | 3             | 3              | 3                         | 3                         |
|             |          |        | Mean          | 0.55                    | 0.133                   | 40.40                       | 29.48                           | 30.19                           | 1.31         | 1.14          | 1.67           | 0.61                      | 0.69                      |
|             |          |        | RE            | 0.04                    | 0.00                    | 3.72                        | 2.97                            | 3.18                            | 0.09         | 0.10          | 0.19           | 0.07                      | 0.09                      |
|             |          |        | %RSD          | 7.41                    | 0.00                    | 9.21                        | 10.08                           | 10.55                           | 6.70         | 9.08          | 11.16          | 11.17                     | 13.01                     |
|             |          |        |               |                         |                         |                             |                                 |                                 |              |               |                |                           |                           |
|             |          | Female | 2152554       | 0.63                    | 0.133                   | 46.48                       | 27.97                           | 28.69                           | 1.59         | 1.10          | 1.74           | 0.55                      | 0.63                      |
|             |          |        | 2152555       | 0.60                    | 0.133                   | 51.08                       | 28.74                           | 29.51                           | 1.46         | 1.13          | 1.69           | 0.58                      | 0.67                      |
|             |          |        | 2152556       | 0.71                    | 0.133                   | 48.79                       | 36.34                           | 36.59                           | 1.40         | 1.17          | 1.37           | 0.82                      | 0.86                      |
|             |          |        | n             | 3                       | 3                       | 3                           | 3                               | 3                               | 3            | 3             | 3              | 3                         | 3                         |
|             |          |        | Mean          | 0.65                    | 0.133                   | 48.78                       | 31.01                           | 31.60                           | 1.48         | 1.13          | 1.60           | 0.65                      | 0.72                      |
|             |          |        | RE            | 0.06                    | 0.00                    | 2.30                        | 4.63                            | 4.35                            | 0.10         | 0.03          | 0.20           | 0.15                      | 0.12                      |
|             |          |        | %RSD          | 8.75                    | 0.00                    | 4.72                        | 14.92                           | 13.76                           | 6.68         | 2.99          | 12.79          | 22.61                     | 16.72                     |

Note: 0.133 h is the immediate end of dosing.

Table S5. Pharmacokinetic parameters of GMDTC in whole blood of rats (100 mg/kg) after intravenous infusion administration

| determinand | Dose      | Sex    | Animal number | t <sub>1/2</sub><br>(h) | T <sub>max</sub><br>(h) | C <sub>max</sub><br>(µg/mL) | AUC <sub>0-t</sub><br>(h·µg/mL) | AUC <sub>0-∞</sub><br>(h·µg/mL) | Vd<br>(L/kg) | Vss<br>(L/kg) | Cl<br>(L/h/kg) | MRT <sub>0-t</sub><br>(h) | MRT <sub>0-∞</sub><br>(h) |
|-------------|-----------|--------|---------------|-------------------------|-------------------------|-----------------------------|---------------------------------|---------------------------------|--------------|---------------|----------------|---------------------------|---------------------------|
| GMDTC       | 100 mg/kg | Male   | 2152557       | 0.51                    | 0.133                   | 117.02                      | 58.94                           | 59.91                           | 1.23         | 0.93          | 1.67           | 0.51                      | 0.56                      |
|             |           |        | 2152558       | 0.54                    | 0.133                   | 123.42                      | 53.21                           | 54.21                           | 1.43         | 1.04          | 1.84           | 0.51                      | 0.57                      |
|             |           |        | 2152559       | 0.57                    | 0.133                   | 129.51                      | 56.45                           | 57.81                           | 1.43         | 1.04          | 1.73           | 0.53                      | 0.60                      |
|             |           |        | n             | 3                       | 3                       | 3                           | 3                               | 3                               | 3            | 3             | 3              | 3                         | 3                         |
|             |           |        | Mean          | 0.54                    | 0.133                   | 123.32                      | 56.20                           | 57.31                           | 1.36         | 1.00          | 1.75           | 0.51                      | 0.57                      |
|             |           |        | RE            | 0.03                    | 0.00                    | 6.25                        | 2.88                            | 2.88                            | 0.11         | 0.07          | 0.09           | 0.01                      | 0.02                      |
|             |           |        | %RSD          | 5.79                    | 0.00                    | 5.07                        | 5.12                            | 5.03                            | 8.39         | 6.48          | 5.10           | 2.20                      | 4.17                      |
|             |           |        |               |                         |                         |                             |                                 |                                 |              |               |                |                           |                           |
|             |           | Female | 2152560       | 0.61                    | 0.133                   | 134.99                      | 63.41                           | 65.09                           | 1.34         | 1.01          | 1.54           | 0.57                      | 0.66                      |
|             |           |        | 2152561       | 0.68                    | 0.133                   | 121.81                      | 59.07                           | 59.27                           | 1.65         | 1.06          | 1.69           | 0.61                      | 0.63                      |
|             |           |        | 2152562       | 0.66                    | 0.133                   | 157.36                      | 63.36                           | 65.00                           | 1.46         | 0.90          | 1.54           | 0.50                      | 0.59                      |
|             |           |        | n             | 3                       | 3                       | 3                           | 3                               | 3                               | 3            | 3             | 3              | 3                         | 3                         |
|             |           |        | Mean          | 0.65                    | 0.133                   | 138.05                      | 61.95                           | 63.12                           | 1.49         | 0.99          | 1.59           | 0.56                      | 0.62                      |
|             |           |        | RE            | 0.04                    | 0.00                    | 17.98                       | 2.49                            | 3.33                            | 0.15         | 0.08          | 0.09           | 0.05                      | 0.03                      |
|             |           |        | %RSD          | 5.69                    | 0.00                    | 13.02                       | 4.02                            | 5.28                            | 10.39        | 7.89          | 5.45           | 9.62                      | 5.50                      |
|             |           |        |               |                         |                         |                             |                                 |                                 |              |               |                |                           |                           |

Note: 0.133 h is the immediate end of dosing.

Table S6. Pharmacokinetic parameters of GMDTC in whole blood of rats (250 mg/kg) after intravenous infusion administration

| determinand | Dose      | Sex    | Animal number | t <sub>1/2</sub><br>(h) | T <sub>max</sub><br>(h) | C <sub>max</sub><br>(µg/mL) | AUC <sub>0-t</sub><br>(h·µg/mL) | AUC <sub>0-∞</sub><br>(h·µg/mL) | Vd<br>(L/kg) | Vss<br>(L/kg) | Cl<br>(L/h/kg) | MRT <sub>0-t</sub><br>(h) | MRT <sub>0-∞</sub><br>(h) |
|-------------|-----------|--------|---------------|-------------------------|-------------------------|-----------------------------|---------------------------------|---------------------------------|--------------|---------------|----------------|---------------------------|---------------------------|
| GMDTC       | 250 mg/kg | Male   | 2152563       | 0.63                    | 0.133                   | 179.03                      | 88.47                           | 88.74                           | 2.57         | 1.86          | 2.82           | 0.64                      | 0.66                      |
|             |           |        | 2152564       | 0.62                    | 0.133                   | 233.89                      | 110.69                          | 110.88                          | 2.02         | 1.18          | 2.25           | 0.51                      | 0.52                      |
|             |           |        | 2152565       | 0.62                    | 0.133                   | 339.39                      | 134.26                          | 134.46                          | 1.66         | 0.91          | 1.86           | 0.48                      | 0.49                      |
|             |           |        | n             | 3                       | 3                       | 3                           | 3                               | 3                               | 3            | 3             | 3              | 3                         | 3                         |
|             |           |        | Mean          | 0.62                    | 0.133                   | 250.77                      | 111.14                          | 111.36                          | 2.08         | 1.32          | 2.31           | 0.55                      | 0.56                      |
|             |           |        | RE            | 0.01                    | 0.00                    | 81.50                       | 22.90                           | 22.86                           | 0.46         | 0.49          | 0.48           | 0.09                      | 0.09                      |
|             |           |        | %RSD          | 1.16                    | 0.00                    | 32.50                       | 20.60                           | 20.53                           | 22.00        | 37.16         | 20.83          | 15.72                     | 16.19                     |
|             |           |        | 2152566       | 0.62                    | 0.133                   | 312.23                      | 132.08                          | 132.36                          | 1.68         | 1.07          | 1.89           | 0.56                      | 0.57                      |
|             |           | Female | 2152567       | 0.66                    | 0.133                   | 350.53                      | 136.68                          | 139.57                          | 1.70         | 0.92          | 1.79           | 0.44                      | 0.51                      |
|             |           |        | 2152568       | 0.65                    | 0.133                   | 310.32                      | 122.83                          | 123.12                          | 1.89         | 1.10          | 2.03           | 0.53                      | 0.54                      |
|             |           |        | n             | 3                       | 3                       | 3                           | 3                               | 3                               | 3            | 3             | 3              | 3                         | 3                         |
|             |           |        | Mean          | 0.64                    | 0.133                   | 324.36                      | 130.53                          | 131.69                          | 1.76         | 1.03          | 1.90           | 0.51                      | 0.54                      |
|             |           |        | RE            | 0.02                    | 0.00                    | 22.68                       | 7.05                            | 8.25                            | 0.12         | 0.10          | 0.12           | 0.06                      | 0.03                      |
|             |           |        | %RSD          | 3.27                    | 0.00                    | 6.99                        | 5.40                            | 6.26                            | 6.64         | 9.27          | 6.32           | 11.54                     | 4.90                      |

Note: 0.133 h is the immediate end of dosing.
